# Supplementary material for: Dry season forage assessment across senegalese rangelands using earth observation data
Source: Frontiers journal article supplement (doi:10.3389/fenvs.2022.931299), 2022-09-29
Supplement: Data_Sheet_1.docx [file Data_Sheet_1.docx]

**SUPPLEMENTARY TABLES**

Supplementary Table 1. List of the 29 vegetation indices used in this study

| Description | MODIS | Landsat-8 | Sentinel-2 | Source |
| --- | --- | --- | --- | --- |
| Vegetation indices by normalized difference | | | | |
| *Normalized Difference Vegetation Index* |  |  |  | (Rouse et al. 1974) |
| *Normalized Difference Index5* |  |  |  | (Mcnairn and Protz 1993) |
| *Normalized Difference Index7* |  |  |  | (Mcnairn and Protz 1993) |
| *Normalized Difference Tillage Index* |  |  |  | (Van Deventer et al. 1997) |
| *Normalized Difference Senescent Vegetation Index* |  |  |  | (Qi et al. 2002) |
| *Blue normalized difference vegetation index* |  |  |  | (Yang et al. 2004) |
| *Green Normalized Difference Vegetation Index* |  |  |  | (Gitelson, Kaufman, and Merzlyak 1996) |
| *Standardized Normalized Difference Vegetation Index* |  |  |  | (Gowda et al. 2001) |
| *Infrared Percentage Vegetation Index* |  |  |  | (Crippen 1990) |
| *Green Vegetation Index* |  |  |  | (Gitelson et al. 2002) |
| *Green Residue Cover Index* |  |  |  | (Kavoosi et al. 2020) |
| *Blue Residue Cover Index* |  |  |  | (Kavoosi et al. 2020) |
| *Renormalized Difference Vegetation Index* |  |  |  | [Reujean et Breon, 1995] |
| *Modified Simple Ratio* |  |  |  | (Chen 1996) |
| *Chlorophyll detection indices* | | | | |
| *Modified Chlorophyll Absorption in Reflectance Index* |  |  |  | (Daughtry et al. 2000) |
| *Transformed Chlorophyll Absorption in Reflectance Index* |  |  |  | (Haboudane et al. 2002) |
| *Triangular Vegetation Index* |  |  |  | (Broge and Leblanc 2001) |
| *Green Chlorophyll Vegetation Index* |  |  |  | (Gitelson et al. 2003) |
| *Vegetation indices with correction for atmospheric or soil effects* | | | | |
| *Visible Atmospherically Resistant Index* |  |  |  | (Gitelson et al. 2002) |
| *Perpendicular Vegetation Index* |  |  |  | (Richardson and Wiegand 1977) |
| *Soil-Adjusted Vegetation Index* |  |  |  | (Huete 1988) |
| *Optimized Soil-Adjusted Vegetation Index* |  |  |  | (Rondeaux, Steven, and Baret 1996) |
| *Crop Residue Cover* |  |  |  | (Sullivan et al. 2006) |
| *Dead Fuel Index* |  |  |  | (Cao et al. 2010) |
| *Soil Tillage Index* |  |  |  | (Van Deventer et al. 1997) |
| *Vegetation indices by ratio* | | | | |
| *Simple Ratio Index* |  |  |  | (Jordan 1969) |
| *Ratio Vegetation Index2* |  |  |  | (Jordan 1969) |
| *Ratio Vegetation Index3* |  |  |  | (Jordan 1969) |
| *Ration B7/B6* |  |  |  | (Guerschman et al. 2009) |

**Supplementary Table 2: Number of models tested to estimate BH and BT**

|  | BH | | | | BT | | | |
| --- | --- | --- | --- | --- | --- | --- | --- | --- |
|  | MLS | MML | RF | GBM | MLS | MML | RF | GBM |
| Landsat-8 | 6 | 57 | 42 | 42 | 6 | 57 | 42 | 42 |
| MODIS | 6 | 57 | 42 | 42 | 6 | 57 | 42 | 42 |
| Sentinel-2 | 7 | 120 | 99 | 99 | 8 | 247 | 219 | 219 |
| Total | 19 | 234 | 183 | 183 | 20 | 361 | 303 | 303 |
| 619 models tested for BH | | | | 987 models tested for BT | | | |

Supplementary Table 3. Optimization parameters used with random forest

| Parameters | Definitions | Typical default values |
| --- | --- | --- |
| mtry | Number of features to use at each split | 1 to 10 |
| ntree | Number of trees to grow | 1 to 25 |
| nodesize | Minimum number of observations in a terminal node | 1 to 5 |

Supplementary Table 4. Optimization parameters used with Gradient Bosting Machines

| Parameters | Definitions | Value tested |
| --- | --- | --- |
| ntree | Total number of trees | 50,100,200 |
| Interaction.depth | Maximum depth of variable interactions | 1,3,6 |
| shrinkage | Learning rate | 0.0001, 0.01, 0.1 |
| n.minobsinnode | Minimum number of observations in the trees terminal nodes | 3,5,10 |

Supplementary Table 5. Simple linear models for the assessment of the herbaceous biomass during the dry-season developed by Jacques et *al.* (2014) and in this study, both using the STI index based on MODIS and the best model using Sentinel-2 images.

| Model equation | Sensor | RMSE (kg‧DM/ha) | R2 | RRMSE (%) | Reference |
| --- | --- | --- | --- | --- | --- |
|  | MODIS | 280 | 0.66 | **44** | Jacques et *al.* (2014) |
|  | MODIS | 555 | 0.42 | **39** | Model of this study |
|  | Sentinel-2 | 378 | 0.74 | **26** | Best model of this study to estimate BH |

Supplementary Table 6. Performance of MLS, MML, RF and GBM models with Landsat-8

| Landsat-8 | | R2 | RMSE | RRMSE | INDICES |
| --- | --- | --- | --- | --- | --- |
| MLS | BH | 0,37 | 569 | 40 | NDI5 |
| BT | 0,39 | 825 | 45 | VIgreen |
| MML | BH | 0,62 | 437 | 30 | NDI5 CRC DFI TCARI |
| BT | 0,77 | 526 | 26 | NDI5 TCARI DFI SRI |
| RF | BH | 0,63 | 476 | 33 | NDI5 BRCI DFI |
| BT | 0,63 | 683 | 34 | NDI5 TCARI VIgreen DFI |
| GBM | BH | 0,68 | 450 | 31 | VARI, BRCI DFI |
| BT | 0,63 | 622 | 31 | NDI5,TCARI DFI SRI |

Supplementary Table 7. Performance of MLS, MML, RF and GBM models with MODIS

| MODIS | | R2 | RMSE | RRMSE | INDICES |
| --- | --- | --- | --- | --- | --- |
| MLS | BH | 0,42 | 575 | 40 | DFI |
| BT | 0,51 | 923 | 46 | NDI5 |
| MML | BH | 0,65 | 414 | 29 | NDI5, DFI, TCARI |
| BT | 0,69 | 551 | 27 | RVI2, NDI5, DFI, TCARI |
| RF | BH | 0,57 | 482 | 34 | NDI5, VIgreen, DFI, TCARI |
| BT | 0,64 | 694 | 35 | NDI5, TCARI, DFI, RVI3 |
| GBM | BH | 0,55 | 469 | 33 | NDI5, VIgreen, DFI, TCARI |
| BT | 0,69 | 605 | 30 | TCARI, DFI, CRC, RVI3 |

**Supplementary Table 8.** Performance of MLS, MML, RF and GBM models with Sentinel-2

| Sentinel-2 | | R2 | RMSE | RRMSE | INDICES |
| --- | --- | --- | --- | --- | --- |
| MLS | BH | 0,43 | 567 | 39 | NDI5 |
| BT | 0,36 | 901 | 45 | NDI5 |
| MML | BH | 0,74 | 378 | 26 | NDI5, GRCI, SRI, DFI, TCARI |
| BT | 0,78 | 496 | 25 | NDI5, DFI, SRI, TCARI, GRCI, RVI3 |
| RF | BH | 0,45 | 544 | 38 | NDI5, SRI, GRCI, DFI, RVI3 |
| BT | 0,53 | 816 | 41 | NDI5, RVI2, DFI, SRI, TCARI, GRCI |
| GBM | BH | 0,53 | 476 | 33 | NDI5, GRCI, DFI, RVI3, TCARI |
| BT | 0,57 | 712 | 35 | NDI5, SRI, TCARI |

References :

Broge, N. H., and E. Leblanc. 2001. “Comparing Prediction Power and Stability of Broadband and Hyperspectral Vegetation Indices for Estimation of Green Leaf Area Index and Canopy Chlorophyll Density.” *Remote Sensing of Environment* 76(2):156–72. doi: 10.1016/S0034-4257(00)00197-8.

Cao, Xin, Jin Chen, B. Matsushita, and H. Imura. 2010. “Developing a MODIS-Based Index to Discriminate Dead Fuel from Photosynthetic Vegetation and Soil Background in the Asian Steppe Area.” *International Journal of Remote Sensing* 31(6):1589–1604. doi: 10.1080/01431160903475274.

Chen, Jing M. 1996. “Evaluation of Vegetation Indices and a Modified Simple Ratio for Boreal Applications.” *Canadian Journal of Remote Sensing* 22(6):229–41. doi: 10.1080/07038992.1996.10855178.

Crippen, Robert E. 1990. “Calculating the Vegetation Index Faster.” *Remote Sensing of Environment* 73:71–73.

Daughtry, C. S. T., C. L. Walthall, M. S. Kim, E. Brown de Colstoun, and E. McMurtrey III. 2000. “Estimating Corn Leaf Chlorophyll Concentration from Leaf and Canopy Reflectance.” *Remote Sensing of Environment* 74:229–39. doi: 10.3184/174751911X556684.

Van Deventer, A. P., A. D. Ward, P. H. Gowda, and J. G. Lyon. 1997. “Using Thematic Mapper Data to Identify Contrasting Soil Plains and Tillage Practices.” *Photogrammetric Engineering and Remote Sensing* 63(1):87–93.

Gitelson, Anatoly A., Yoram J. Kaufman, and Mark N. Merzlyak. 1996. “Use of a Green Channel in Remote Sensing of Global Vegetation from EOS- MODIS.” *Remote Sensing of Environment* 58(3):289–98. doi: 10.1016/S0034-4257(96)00072-7.

Gitelson, Anatoly A., Yoram J. Kaufman, Robert Stark, and Don Rundquist. 2002. “Novel Algorithms for Remote Estimation of Vegetation Fraction.” *Remote Sensing of Environment* 80:76–87.

Gitelson, Anatoly A., Andres Vina, Timothy J. Arkebauer, Donald C. Rundquist, Galina Keydan, and Bryan Leavitt. 2003. “Remote Estimation of Leaf Area Index and Green Leaf Biomass in Maize Canopies.” *Geophysical Research Letters* 30(5):1248.

Gowda, P. H., B. J. Dalzell, D. J. Mulla, and F. Kollman. 2001. “Mapping Tillage Practices with Landstat Thematic Mapper Based Logistic Regression Models.” *Journal of Soil and Water Conservation* 56(2):91–96.

Guerschman, Juan Pablo, Michael J. Hill, Luigi J. Renzullo, Damian J. Barrett, Alan S. Marks, and Elizabeth J. Botha. 2009. “Estimating Fractional Cover of Photosynthetic Vegetation, Non-Photosynthetic Vegetation and Bare Soil in the Australian Tropical Savanna Region Upscaling the EO-1 Hyperion and MODIS Sensors.” *Remote Sensing of Environment* 113(5):928–45. doi: 10.1016/j.rse.2009.01.006.

Haboudane, Driss, John R. Miller, Nicolas Tremblay, Pablo J. Zarco-Tejada, and Louise Dextraze. 2002. “Integrated Narrow-Band Vegetation Indices for Prediction of Crop Chlorophyll Content for Application to Precision Agriculture.” *Remote Sensing of Environment* 81(2–3):416–26. doi: 10.1016/S0034-4257(02)00018-4.

Huete, A. R. 1988. “A Soil-Adjusted Vegetation Index ( SAVI ).” *Remote Sensing of Environment* 25:295–309.

Jacques, Damien Christophe, Laurent Kergoat, Pierre Hiernaux, Eric Mougin, and Pierre Defourny. 2014. “Monitoring Dry Vegetation Masses in Semi-Arid Areas with MODIS SWIR Bands.” *Remote Sensing of Environment* 153:40–49. doi: 10.1016/j.rse.2014.07.027.

Jordan, Carl F. 1969. “Derivation of Leaf-Area Index from Quality of Light on the Forest Floor.” *Ecology* 50(4):663–66. doi: 10.1155/2012/651039.

Kavoosi, Zahra, Mohammad Hossein Raoufat, Maryam Dehghani, Jafari Abdolabbas, Seyed Abdolreza Kazemeini, and Mohammad Jafar Nazemossadat. 2020. “Feasibility of Satellite and Drone Images for Monitoring Soil Residue Cover.” *Journal of the Saudi Society of Agricultural Sciences* 19(1):56–64. doi: 10.1016/j.jssas.2018.06.001.

Mcnairn, H., and R. Protz. 1993. “Mapping Corn Residue Cover on Agricultural Fields in Oxford County, Ontario, Using Thematic Mapper.” *Canadian Journal of Remote Sensing* 19(2):152–59. doi: 10.1080/07038992.1993.10874543.

Qi, Jiaguo, Robin Marsett, Philip Heilman, Sharon Bieden-bender, Susan Moran, and David Goodrich. 2002. “RANGES Improves Satellite-Based Information and Land Cover Assessments in Southwest United States.” *Eos, Transactions American Geophysical Union* 83(51):601–12.

Richardson, A. J., and C. L. Wiegand. 1977. “Distinguishing Vegetation from Soil Background Information.” *Photogrammetric Engineering and Remote Sensing* 43(12):1541–52.

Rondeaux, Geneviève, Michael Steven, and Frédéric Baret. 1996. “Optimization of Soil-Adjusted Vegetation Indices.” *Remote Sensing of Environment* 55(2):95–107. doi: 10.1016/0034-4257(95)00186-7.

Rouse, W. J., R. H. Haas, J. A. Schell, and D. W. Deering. 1974. “Monitoring Vegetation Systems in the Great Plains With Erts.” 309–17.

Sullivan, Dana G., Clint C. Truman, Harry H. Schomberg, Dinku M. Endale, and Timothy C. Strickland. 2006. “Evaluating Techniques for Determining Tillage Regime in the Southeastern Coastal Plain and Piedmont.” *Agronomy Journal* 98:1236–46. doi: 10.2134/agronj2005.0294.

Yang, Chenghai, James H. Everitt, Joe M. Bradford, and Dale Murden. 2004. “Airborne Hyperspectral Imagery and Yield Monitor Data for Mapping Cotton Yield Variability.” *Precision Agriculture* 5(5):445–61. doi: 10.1007/s11119-004-5319-8.
